# Supplementary material for: Anti-Inflammatory Effects of Endogenously Released Adenosine in Synovial Cells of Osteoarthritis and Rheumatoid Arthritis Patients
Source: MDPI journal article supplement (doi:10.3390/ijms22168956), 2021-08-19
Supplement: s1 [file s1]

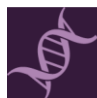

## Supplementary material to the Article

# Anti-Inflammatory Effects of Endogenously Released Adenosine in Synovial Cells of Osteoarthritis and Rheumatoid Arthritis Patients

Rebecca Sohn <sup>1§</sup>, Marius Junker <sup>1§</sup>, Andrea Meurer <sup>1</sup>, Frank Zaucke <sup>1</sup>, Rainer H. Straub <sup>2#</sup>, Zsuzsa Jenei-Lanzl <sup>1\*#</sup>

<sup>1</sup> Dr. Rolf M. Schwiete Research Unit for Osteoarthritis, Department of Orthopedics (Friedrichsheim), University Hospital Frankfurt, Goethe University, 60528 Frankfurt / Main, Germany; rebecca.sohn@kgu.de (R.S.), marius.junker@kgu.de (M.J.), andrea.meurer@kgu.de (A.M.), frank.zaucke@kgu.de (F.Z.), zsuzsa.jenei-lanzl@kgu.de (Z.J.-L.)

<sup>2</sup> Laboratory of Experimental Rheumatology and Neuroendocrine Immunology, Department of Internal Medicine, University Hospital Regensburg, 93053 Regensburg, Germany; rainer.straub@ukr.de (R.H.S.)

§ Contributed equally as first author

# Contributed equally as senior author

\* Correspondence: zsuzsa.jenei-lanzl@kgu.de (Z.J.-L.); Tel.: +49-69-6301-94-408

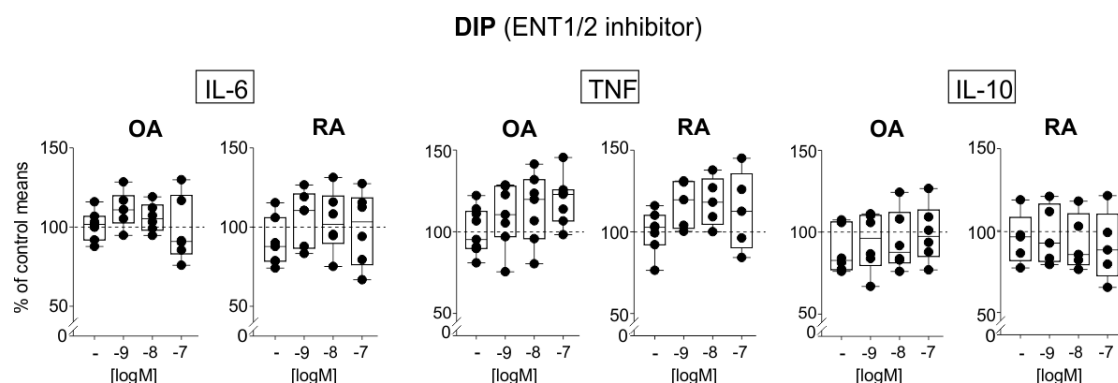

**Supplementary Figure S1.** Effect of ENT1/2 inhibitor. ENT1/2 inhibition in OA and RA mixed synovial cell cultures using DIP ( $10^{-7}$  M to  $10^{-9}$  M). Data are represented as box plots (as explained in the legend of Figure 1) ( $n=5-6$ ). Values are expressed as percent of untreated control (untreated control is represented as “-”; the mean of untreated control is represented as dashed line = 100%).

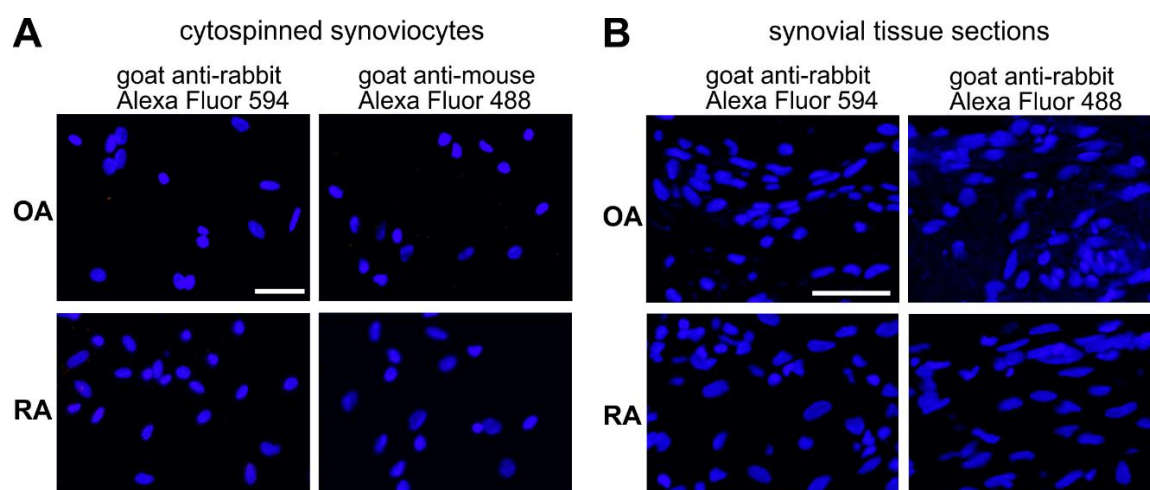

**Supplementary Figure S2.** Negative controls (without primary but with secondary antibodies) for the immunostainings of (A) cytopinned synoviocytes (bar: 25  $\mu$ m) and (B) synovial tissue sections (bar: 50  $\mu$ m) represented in Fig.1, Fig.2, and Fig.3 (goat anti-rabbit Alexa Fluor 594 for CD39, ENT1, ENT2, all ARs; goat anti-mouse Alexa Fluor 488 for CD73; goat anti-rabbit Alexa Fluor 488 for ADA). Cell nuclei were counterstained with DAPI (blue).

Abbreviations: OA - osteoarthritis;; RA – rheumatoid arthritis.
